# Supplementary material
Source: publisher figshare collection journal article supplement (https://acs.figshare.com/ndownloader/files/4733638)
Supplement: Supplementary file 1 [file 4733638]

# CIF-file generated for  BASH 1044-173
# Compound xx
#===================================================================
data_global
#===================================================================

# 0. AUDIT DETAILS

_audit_creation_date            6-Jul-06
_audit_creation_method           'PLATON <TABLE ACC> option'
_audit_update_record
;
   6-Jul-06  Updated by the Author E.H.
             Text writing by E.H.
             Checkcif    OK
  17-Jul-06  Updated by the Author E.H.
  28-Aug-06  Updated by the Author E.H.
;

#===================================================================
# 1. SUBMISSION DETAILS
#===================================================================

# Name and address of author for X-ray correspondence
_publ_contact_author_name
;
       Dr. Eberhardt Herdtweck
;
_publ_contact_author_address
;
       Department Chemie,
       Lehrstuhl f\"ur Anorganische Chemie,
       Technische Universit\"at M\"unchen,
       Lichtenbergstrasse 4,
       D-85747 Garching bei M\"unchen,
       Germany.
;
_publ_contact_author_email   'eberhardt.herdtweck@ch.tum.de'
_publ_contact_author_fax     '+49(0)89 289 13473'
_publ_contact_author_phone   '+49(0)89 289 13143'

_publ_requested_journal              'Organometallics'
# Publication choise FI FM FO CI CM CO
_publ_requested_category             ?
_publ_requested_coeditor_name        ?

_publ_contact_letter                # Include date of submission
;
Date of submission: August 2006
;

#===================================================================
# 2. PROCESSING SUMMARY (JOURNAL OFFICE ONLY)
#===================================================================

_journal_date_recd_electronic    ?

_journal_date_to_coeditor        ?
_journal_date_from_coeditor      ?
_journal_date_accepted           ?

_journal_date_printers_first     ?
_journal_date_printers_final     ?
_journal_date_proofs_out         ?
_journal_date_proofs_in          ?

_journal_coeditor_name           ?
_journal_coeditor_code           ?
_journal_coeditor_notes
; ?
;

_journal_techeditor_code         ?
_journal_techeditor_notes
; ?
;

_journal_coden_ASTM              ?
_journal_name_full               ?
_journal_year                    ?
_journal_volume                  ?
_journal_issue                   ?
_journal_page_first              ?
_journal_page_last               ?


_journal_suppl_publ_number       ?
_journal_suppl_publ_pages        ?


#===================================================================
# 3. TITLE AND AUTHOR LIST
#===================================================================

_publ_section_title
;
 Chiral N-Heterocyclic Carbene with Restricted
 Flexibility in Asymmetric Catalysis
;

# The loop structure below should contain the names and addresses of all
# authors, in the required order of publication. Repeat as necessary.

loop_
_publ_author_name
_publ_author_address
       'Baskakov, D.'
;
       Department Chemie,
       Lehrstuhl f\"ur Anorganische Chemie,
       Technische Universit\"at M\"unchen,
       Lichtenbergstrasse 4,
       D-85747 Garching bei M\"unchen,
       Germany.
;
       'Herrmann, W. A.'
;
       Department Chemie,
       Lehrstuhl f\"ur Anorganische Chemie,
       Technische Universit\"at M\"unchen,
       Lichtenbergstrasse 4,
       D-85747 Garching bei M\"unchen,
       Germany.
;
       'Herdtweck, E.'
;
       Department Chemie,
       Lehrstuhl f\"ur Anorganische Chemie,
       Technische Universit\"at M\"unchen,
       Lichtenbergstrasse 4,
       D-85747 Garching bei M\"unchen,
       Germany.
;
       'Hoffmann, S. D.'
;
       Department Chemie,
       Lehrstuhl f\"ur Anorganische Chemie
       mit Schwerpunkt Neue Materialen,
       Technische Universit\"at M\"unchen,
       Lichtenbergstrasse 4,
       D-85747 Garching bei M\"unchen,
       Germany.
;

#===================================================================
# 4. TEXT
#===================================================================

_publ_section_synopsis
;
 
;
_publ_section_abstract
;
 A novel chiral C2-symmetric diamine...
;

# Insert blank lines between paragraphs

_publ_section_comment
;

;

_publ_section_experimental
;

;

# Insert blank lines between references

_publ_section_references
;
 Altomare, A., Cascarano, G., Giacovazzo, C., Guagliardi, A., Burla, M. C.,
 Polidori, G. & Camalli, M. (1994). SIR92, J. Appl. Cryst. 27, 435-436.

 Farrugia, L. J. (1999). WinGX (Version 1.70.01 January 2005),
 J. Appl. Cryst. 32, 837-838.

 Sheldrick, G. M. (1998). SHELXS-97, University of G\"ottingen, G\"ottingen,
 Germany.

 Sheldrick, G. M. (1998). SHELXL-97, University of G\"ottingen, G\"ottingen,
 Germany.

 Spek, A. L. (2005). PLATON, A Multipurpose Crystallographic Tool, Utrecht
 University, Utrecht, The Netherlands.
 
 Stoe (2004). X-AREA, Version 1.26,  Stoe & Cie GmbH, Darmstadt, Germany.
;
_publ_section_figure_captions
;

;
_publ_section_acknowledgements
;

;

_publ_section_table_legends
;

;

#===================================================================
data_BASH-1044-173
#===================================================================
#===================================================================
# 5. CHEMICAL DATA
#===================================================================

_chemical_name_systematic
;
 
;
_chemical_name_common          ?
_chemical_formula_moiety
'C39 H36 Cl N2 Rh'
_chemical_formula_structural     ?
_chemical_formula_analytical     ?
_chemical_formula_sum
'C39 H36 Cl N2 Rh'
_chemical_formula_weight                671.06

loop_
_atom_type_symbol
_atom_type_description
_atom_type_scat_dispersion_real
_atom_type_scat_dispersion_imag
_atom_type_scat_source
Rh  Rh   -1.1178    0.9187
 'International Tables Vol C Tables 4.2.6.8 and 6.1.1.4'
 N   N    0.0061    0.0033
 'International Tables Vol C Tables 4.2.6.8 and 6.1.1.4'
Cl  Cl    0.1484    0.1585
 'International Tables Vol C Tables 4.2.6.8 and 6.1.1.4'
 H   H    0.0000    0.0000
 'International Tables Vol C Tables 4.2.6.8 and 6.1.1.4'
 C   C    0.0033    0.0016
 'International Tables Vol C Tables 4.2.6.8 and 6.1.1.4'

#===================================================================
# 6. CRYSTAL DATA
#===================================================================

_symmetry_cell_setting               Orthorhombic
_symmetry_space_group_name_Hall      'P 2ac 2ab'
_symmetry_space_group_name_H-M       'P 21 21 21'
_symmetry_Int_Tables_number                 19
 
loop_
_symmetry_equiv_pos_as_xyz
 x,y,z
 1/2-x,-y,1/2+z
 1/2+x,1/2-y,-z
 -x,1/2+y,1/2-z
 
_cell_length_a                           8.7505(4)
_cell_length_b                          17.5279(8)
_cell_length_c                         20.1836(10)
_cell_angle_alpha                               90
_cell_angle_beta                                90
_cell_angle_gamma                               90
_cell_volume                             3095.7(3)
_cell_formula_units_Z                    4
_cell_measurement_temperature     173(1)
_cell_measurement_reflns_used     24213
_cell_measurement_theta_min        2.82
_cell_measurement_theta_max       27.27

_exptl_crystal_description        'fragment'
_exptl_crystal_colour             'yellow'
_exptl_crystal_size_max           0.51 
_exptl_crystal_size_mid           0.38 
_exptl_crystal_size_min           0.30 
_exptl_crystal_density_meas               none
_exptl_crystal_density_diffrn            1.440
_exptl_crystal_density_method             none
_exptl_crystal_F_000                      1384
_exptl_absorpt_coefficient_mu            0.669
_exptl_absorpt_correction_type    'multi-scan'
_exptl_absorpt_correction_T_min   0.361 
_exptl_absorpt_correction_T_max   0.820 

_exptl_absorpt_process_details
;
 Numerical absorption correction after crystal shape optimization
 source: (Stoe, 2004)
;

_exptl_special_details
;
Diffractometer operator           S. Hoffmann
exposure_time                     120 s per image
exposure_run_1_phi                0
exposure_omega_range              1-180
exposure_delta_omega              1.0
exposure_run_2_phi                90
exposure_omega_range              1-180
exposure_delta_omega              1.0
exposure_sum_images               360
;

_publ_section_exptl_prep
;
 The crystal was fixed in a capillary with perfluorinated ether and
 transferred to the diffractometer.
;

_publ_section_exptl_refinement
;
 Solution and refinements with the program WinGX;
 Farrugia (1999).
 Hydrogen atoms could not be located in the difference Fourier maps
 and were calculated in ideal positions (riding model).
;

#===================================================================
# 7. EXPERIMENTAL DATA
#===================================================================

_diffrn_ambient_temperature       173(1)
_diffrn_radiation_wavelength      0.71073
_diffrn_radiation_type            'Mo K\a'
_diffrn_radiation_source          'NONIUS FR 591 rotating anode'
_diffrn_radiation_monochromator   graphite

_diffrn_measurement_device             'two-circle diffractometer'
_diffrn_measurement_device_type        'IPDS 2T (Stoe)'
_diffrn_measurement_method             'omega-rotation/oscillation '
_diffrn_detector                       'image plate'
_diffrn_detector_area_resol_mean       6.67

_diffrn_standards_decay_%             0
# number of measured reflections (redundant set)
_diffrn_reflns_number             39503 
_diffrn_reflns_av_R_equivalents   0.067 
_diffrn_reflns_av_sigmaI/netI     0.0318
_diffrn_reflns_limit_h_min        -11
_diffrn_reflns_limit_h_max        11
_diffrn_reflns_limit_k_min        -22
_diffrn_reflns_limit_k_max        22
_diffrn_reflns_limit_l_min        -25
_diffrn_reflns_limit_l_max        25
_diffrn_reflns_theta_min          3.24
_diffrn_reflns_theta_max          26.76
_reflns_number_total              6539
_reflns_number_gt                 6300

# number of observed reflections (> n sig(I))
_reflns_threshold_expression         'I>2\s(I)'

_computing_data_collection       'X-AREA (Stoe, 2004)'
_computing_cell_refinement       'X-AREA (Stoe, 2004)'
_computing_data_reduction        'X-AREA (Stoe, 2004)'
_computing_structure_solution    'SIR92 (Altomare, 1994)'
_computing_structure_refinement  'SHELXL-97 (Sheldrick, 1998)'
_computing_molecular_graphics    'PLATON (Spek, 2005)'
_computing_publication_material  'PLATON (Spek, 2005)' 

#===================================================================
# 8. REFINEMENT DATA
#===================================================================

_refine_special_details
;
 Refinement on F^2^ for ALL reflections except for 0 with very negative F^2^
 or flagged by the user for potential systematic errors.  Weighted R-factors
 wR and all goodnesses of fit S are based on F^2^, conventional R-factors R
 are based on F, with F set to zero for negative F^2^. The observed criterion
 of F^2^ > 2sigma(F^2^) is used only for calculating  R_factor_obs etc. and is
 not relevant to the choice of reflections for refinement.  R-factors based
 on F^2^ are statistically about twice as large as those based on F, and R-
 factors based on ALL data will be even larger.

;

_refine_ls_structure_factor_coef  Fsqd
_refine_ls_matrix_type            full
_refine_ls_weighting_scheme      sigma
_refine_ls_weighting_details
 'w=1/[\s^2^(Fo^2^)+(Fo^2^)+(0.0293P)^2^+1.0760P] where P=(Fo^2^+2Fc^2^)/3'
_atom_sites_solution_primary      direct
_atom_sites_solution_secondary    difmap
_atom_sites_solution_hydrogens    geom
_refine_ls_hydrogen_treatment     constr 
_refine_ls_extinction_method      none
_refine_ls_extinction_coef        ?
_refine_ls_abs_structure_details
 'Flack H D (1983), Acta Cryst. A39, 876-881'
_refine_ls_abs_structure_Flack    -0.022(19)
_chemical_absolute_configuration      ad
_refine_ls_number_reflns          6539
_refine_ls_number_parameters      388
_refine_ls_number_restraints      0
_refine_ls_R_factor_all           0.0299
_refine_ls_R_factor_gt            0.0275
_refine_ls_wR_factor_ref          0.0625
_refine_ls_wR_factor_gt           0.0607
_refine_ls_goodness_of_fit_ref    1.099
_refine_ls_restrained_S_all       1.099
_refine_ls_shift/su_max           0.001
_refine_ls_shift/su_mean          0.000

_diffrn_measured_fraction_theta_max    0.993
_diffrn_reflns_theta_full              26.76
_diffrn_measured_fraction_theta_full   0.993

_refine_diff_density_max    0.301
_refine_diff_density_min   -0.526
_refine_diff_density_rms    0.075

#===================================================================
# 9. ATOMIC COORDINATES AND THERMAL PARAMETERS
#===================================================================

loop_
_atom_site_label
_atom_site_type_symbol
_atom_site_thermal_displace_type
_atom_site_fract_x
_atom_site_fract_y
_atom_site_fract_z
_atom_site_occupancy
_atom_site_U_iso_or_equiv
_atom_site_calc_flag
_atom_site_refinement_flags
Rh Rh Uani 0.03422(2) 0.40703(1) 0.08739(1) 1.000 0.0252(1) . .
Cl Cl Uani -0.22783(7) 0.37117(4) 0.07552(3) 1.000 0.0345(2) . .
N1 N Uani -0.0472(3) 0.51494(10) -0.02393(9) 1.000 0.0242(6) . .
N2 N Uani -0.0105(2) 0.57944(10) 0.06420(8) 1.000 0.0236(6) . .
C1 C Uani -0.0110(3) 0.50654(13) 0.04074(11) 1.000 0.0246(7) . .
C2 C Uani -0.0715(3) 0.59130(14) -0.04149(10) 1.000 0.0239(6) . .
C3 C Uani -0.0506(3) 0.63254(13) 0.01542(10) 1.000 0.0246(7) . .
C4 C Uani -0.0710(3) 0.45066(13) -0.06998(11) 1.000 0.0271(7) . .
C5 C Uani -0.2062(3) 0.47303(15) -0.11394(13) 1.000 0.0303(8) . .
C6 C Uani -0.1778(3) 0.54862(15) -0.14749(12) 1.000 0.0269(7) . .
C7 C Uani -0.1091(3) 0.60765(14) -0.11141(11) 1.000 0.0262(7) . .
C8 C Uani -0.0711(3) 0.67628(15) -0.14288(12) 1.000 0.0302(8) . .
C9 C Uani -0.1088(3) 0.68575(17) -0.20954(12) 1.000 0.0346(8) . .
C10 C Uani -0.1802(3) 0.62884(17) -0.24443(12) 1.000 0.0353(8) . .
C11 C Uani -0.2138(3) 0.56025(16) -0.21416(12) 1.000 0.0325(8) . .
C12 C Uani -0.0083(3) 0.60196(14) 0.13438(10) 1.000 0.0258(7) . .
C13 C Uani 0.0846(3) 0.67565(15) 0.13748(12) 1.000 0.0293(7) . .
C14 C Uani 0.0121(3) 0.73596(13) 0.09398(11) 1.000 0.0272(7) . .
C15 C Uani -0.0595(3) 0.71305(14) 0.03465(11) 1.000 0.0256(7) . .
C16 C Uani -0.1388(3) 0.76775(14) -0.00281(13) 1.000 0.0326(8) . .
C17 C Uani -0.1374(4) 0.84390(16) 0.01567(14) 1.000 0.0395(9) . .
C18 C Uani -0.0593(3) 0.86625(15) 0.07213(13) 1.000 0.0394(9) . .
C19 C Uani 0.0118(3) 0.81226(15) 0.11156(12) 1.000 0.0336(8) . .
C20 C Uani 0.0742(3) 0.42895(14) -0.10631(11) 1.000 0.0269(7) . .
C21 C Uani 0.1085(3) 0.35127(15) -0.11264(13) 1.000 0.0336(8) . .
C22 C Uani 0.2400(4) 0.32677(17) -0.14526(15) 1.000 0.0414(9) . .
C23 C Uani 0.3385(4) 0.37922(18) -0.17157(14) 1.000 0.0431(9) . .
C24 C Uani 0.3076(4) 0.45648(18) -0.16583(15) 1.000 0.0423(10) . .
C25 C Uani 0.1760(3) 0.48119(15) -0.13368(13) 1.000 0.0344(8) . .
C26 C Uani -0.1714(3) 0.60877(13) 0.16029(11) 1.000 0.0275(7) . .
C27 C Uani -0.2902(3) 0.56908(17) 0.13097(14) 1.000 0.0370(8) . .
C28 C Uani -0.4370(3) 0.57224(18) 0.15664(15) 1.000 0.0444(10) . .
C29 C Uani -0.4674(4) 0.61447(16) 0.21243(14) 1.000 0.0406(8) . .
C30 C Uani -0.3510(3) 0.65480(16) 0.24161(13) 1.000 0.0375(8) . .
C31 C Uani -0.2052(3) 0.65253(15) 0.21623(12) 1.000 0.0325(8) . .
C32 C Uani 0.2504(3) 0.44686(16) 0.12013(14) 1.000 0.0346(8) . .
C33 C Uani 0.2649(3) 0.41392(19) 0.05710(13) 1.000 0.0371(8) . .
C34 C Uani 0.3285(4) 0.3349(2) 0.04252(16) 1.000 0.0486(10) . .
C35 C Uani 0.2653(4) 0.27255(18) 0.08716(18) 1.000 0.0519(10) . .
C36 C Uani 0.1036(4) 0.28732(15) 0.11064(14) 1.000 0.0389(8) . .
C37 C Uani 0.0693(3) 0.32387(14) 0.16855(13) 1.000 0.0344(8) . .
C38 C Uani 0.1793(4) 0.35968(18) 0.21616(14) 1.000 0.0440(10) . .
C39 C Uani 0.3033(4) 0.4079(2) 0.18358(13) 1.000 0.0426(9) . .
H41 H Uiso -0.10310 0.40560 -0.04300 1.000 0.0320 calc R
H51 H Uiso -0.22260 0.43310 -0.14790 1.000 0.0360 calc R
H52 H Uiso -0.29990 0.47650 -0.08660 1.000 0.0360 calc R
H81 H Uiso -0.02060 0.71580 -0.11920 1.000 0.0360 calc R
H91 H Uiso -0.08450 0.73240 -0.23110 1.000 0.0420 calc R
H101 H Uiso -0.20660 0.63670 -0.28960 1.000 0.0420 calc R
H111 H Uiso -0.26180 0.52080 -0.23880 1.000 0.0390 calc R
H121 H Uiso 0.04620 0.56170 0.16030 1.000 0.0310 calc R
H131 H Uiso 0.08910 0.69410 0.18380 1.000 0.0350 calc R
H132 H Uiso 0.19040 0.66570 0.12240 1.000 0.0350 calc R
H161 H Uiso -0.19380 0.75240 -0.04110 1.000 0.0390 calc R
H171 H Uiso -0.19000 0.88070 -0.01030 1.000 0.0470 calc R
H181 H Uiso -0.05460 0.91870 0.08380 1.000 0.0470 calc R
H191 H Uiso 0.06120 0.82780 0.15120 1.000 0.0400 calc R
H211 H Uiso 0.04080 0.31450 -0.09430 1.000 0.0400 calc R
H221 H Uiso 0.26110 0.27380 -0.14920 1.000 0.0500 calc R
H231 H Uiso 0.42830 0.36270 -0.19380 1.000 0.0520 calc R
H241 H Uiso 0.37660 0.49270 -0.18400 1.000 0.0510 calc R
H251 H Uiso 0.15540 0.53430 -0.13040 1.000 0.0410 calc R
H271 H Uiso -0.27080 0.53920 0.09260 1.000 0.0440 calc R
H281 H Uiso -0.51720 0.54500 0.13550 1.000 0.0530 calc R
H291 H Uiso -0.56760 0.61580 0.23060 1.000 0.0490 calc R
H301 H Uiso -0.37140 0.68470 0.27990 1.000 0.0450 calc R
H311 H Uiso -0.12640 0.68110 0.23700 1.000 0.0390 calc R
H321 H Uiso 0.20520 0.49600 0.12340 1.000 0.0410 calc R
H331 H Uiso 0.23210 0.44350 0.02030 1.000 0.0440 calc R
H341 H Uiso 0.30540 0.32170 -0.00410 1.000 0.0580 calc R
H342 H Uiso 0.44100 0.33630 0.04740 1.000 0.0580 calc R
H351 H Uiso 0.26760 0.22350 0.06280 1.000 0.0620 calc R
H352 H Uiso 0.33270 0.26730 0.12630 1.000 0.0620 calc R
H361 H Uiso 0.02160 0.27020 0.08360 1.000 0.0470 calc R
H371 H Uiso -0.03590 0.32690 0.17990 1.000 0.0410 calc R
H381 H Uiso 0.22880 0.31880 0.24230 1.000 0.0530 calc R
H382 H Uiso 0.12130 0.39230 0.24740 1.000 0.0530 calc R
H391 H Uiso 0.33790 0.44730 0.21540 1.000 0.0510 calc R
H392 H Uiso 0.39200 0.37480 0.17330 1.000 0.0510 calc R
 
loop_
_atom_site_aniso_label
_atom_site_aniso_U_11
_atom_site_aniso_U_22
_atom_site_aniso_U_33
_atom_site_aniso_U_23
_atom_site_aniso_U_13
_atom_site_aniso_U_12
Rh 0.0255(1) 0.0244(1) 0.0258(1) 0.0038(1) -0.0017(1) -0.0002(1)
Cl 0.0298(3) 0.0390(3) 0.0348(3) 0.0049(3) -0.0008(2) -0.0078(3)
N1 0.0292(11) 0.0209(9) 0.0226(9) -0.0008(7) -0.0006(8) 0.0005(9)
N2 0.0254(11) 0.0255(10) 0.0198(8) 0.0018(7) -0.0016(7) 0.0005(8)
C1 0.0244(13) 0.0263(11) 0.0232(10) 0.0010(9) 0.0002(9) 0.0015(10)
C2 0.0258(12) 0.0235(10) 0.0224(10) 0.0001(10) -0.0009(8) 0.0019(10)
C3 0.0255(13) 0.0261(11) 0.0222(10) 0.0015(9) -0.0013(9) 0.0008(10)
C4 0.0323(15) 0.0223(11) 0.0266(11) -0.0028(9) 0.0000(9) -0.0010(10)
C5 0.0280(14) 0.0302(13) 0.0326(12) -0.0049(11) -0.0039(10) -0.0026(11)
C6 0.0251(13) 0.0316(13) 0.0241(11) -0.0024(10) -0.0005(9) 0.0054(10)
C7 0.0267(13) 0.0298(14) 0.0222(10) 0.0001(9) 0.0014(9) 0.0039(10)
C8 0.0340(16) 0.0278(12) 0.0288(12) 0.0006(10) 0.0005(10) 0.0018(11)
C9 0.0398(16) 0.0356(14) 0.0284(12) 0.0079(11) 0.0036(11) 0.0058(12)
C10 0.0363(16) 0.0496(16) 0.0200(11) 0.0031(11) -0.0005(10) 0.0120(13)
C11 0.0330(15) 0.0387(14) 0.0258(12) -0.0097(11) -0.0032(10) 0.0082(12)
C12 0.0317(14) 0.0279(12) 0.0178(9) 0.0009(9) -0.0013(8) -0.0015(10)
C13 0.0284(13) 0.0356(14) 0.0239(11) -0.0017(10) -0.0028(9) -0.0059(11)
C14 0.0261(13) 0.0293(11) 0.0263(10) -0.0023(9) 0.0024(10) -0.0052(9)
C15 0.0259(14) 0.0246(11) 0.0263(10) 0.0017(9) 0.0004(9) -0.0009(10)
C16 0.0385(16) 0.0287(13) 0.0305(12) -0.0033(10) -0.0053(11) 0.0048(11)
C17 0.0455(18) 0.0298(13) 0.0432(15) -0.0030(11) -0.0069(13) 0.0082(13)
C18 0.0423(18) 0.0286(12) 0.0472(15) -0.0112(11) -0.0025(12) 0.0034(12)
C19 0.0354(16) 0.0333(13) 0.0321(11) -0.0089(10) -0.0011(10) -0.0066(12)
C20 0.0317(14) 0.0267(12) 0.0224(10) -0.0018(9) -0.0051(9) 0.0019(10)
C21 0.0350(15) 0.0274(13) 0.0384(13) -0.0048(11) -0.0048(11) 0.0019(11)
C22 0.0451(18) 0.0353(15) 0.0439(16) -0.0084(13) -0.0045(13) 0.0123(14)
C23 0.0395(17) 0.0523(17) 0.0376(14) -0.0081(13) 0.0037(12) 0.0130(15)
C24 0.0399(18) 0.0434(16) 0.0436(16) 0.0035(13) 0.0120(13) 0.0004(14)
C25 0.0411(17) 0.0268(13) 0.0354(13) -0.0003(11) 0.0068(12) 0.0035(12)
C26 0.0328(14) 0.0255(12) 0.0241(11) 0.0027(9) 0.0004(9) -0.0027(10)
C27 0.0350(15) 0.0413(15) 0.0346(13) -0.0095(11) 0.0045(11) -0.0081(12)
C28 0.0312(17) 0.0518(18) 0.0502(16) -0.0055(13) 0.0022(12) -0.0123(13)
C29 0.0338(14) 0.0404(14) 0.0476(14) 0.0046(12) 0.0119(14) 0.0009(13)
C30 0.0449(16) 0.0368(14) 0.0307(13) -0.0017(11) 0.0068(12) 0.0065(13)
C31 0.0377(15) 0.0321(13) 0.0276(12) -0.0033(10) -0.0025(11) 0.0017(11)
C32 0.0238(14) 0.0338(14) 0.0461(15) 0.0055(12) -0.0031(11) 0.0008(11)
C33 0.0230(13) 0.0485(16) 0.0397(13) 0.0099(14) -0.0035(10) 0.0038(13)
C34 0.0354(17) 0.066(2) 0.0444(16) -0.0022(15) -0.0005(13) 0.0150(16)
C35 0.055(2) 0.0470(17) 0.0537(17) -0.0037(17) -0.0034(17) 0.0238(15)
C36 0.0473(17) 0.0263(12) 0.0432(14) 0.0055(11) -0.0079(12) 0.0043(12)
C37 0.0398(17) 0.0289(13) 0.0346(13) 0.0091(11) -0.0048(11) 0.0003(11)
C38 0.058(2) 0.0408(16) 0.0332(14) 0.0078(12) -0.0098(13) 0.0012(14)
C39 0.0395(16) 0.0503(16) 0.0380(14) -0.0032(14) -0.0126(11) -0.0011(15)

#==================================================================
# 10. MOLECULAR GEOMETRY
#===================================================================

loop_
_geom_bond_atom_site_label_1
_geom_bond_atom_site_label_2
_geom_bond_distance
_geom_bond_site_symmetry_1
_geom_bond_site_symmetry_2
_geom_bond_publ_flag
 Rh      Cl        2.3897(7)                     .       .                   yes
 Rh      C1         2.021(2)                     .       .                   yes
 Rh      C32        2.122(3)                     .       .                   yes
 Rh      C33        2.113(3)                     .       .                   yes
 Rh      C36        2.234(3)                     .       .                   yes
 Rh      C37        2.214(3)                     .       .                   yes
 N1      C1         1.351(3)                     .       .                   yes
 N1      C2         1.401(3)                     .       .                   yes
 N1      C4         1.475(3)                     .       .                   yes
 N2      C1         1.363(3)                     .       .                   yes
 N2      C3         1.400(3)                     .       .                   yes
 N2      C12        1.471(3)                     .       .                   yes
 C2      C3         1.369(3)                     .       .                   no
 C2      C7         1.477(3)                     .       .                   no
 C3      C15        1.466(3)                     .       .                   no
 C4      C5         1.530(4)                     .       .                   no
 C4      C20        1.516(4)                     .       .                   no
 C5      C6         1.509(4)                     .       .                   no
 C6      C7         1.401(4)                     .       .                   no
 C6      C11        1.397(3)                     .       .                   no
 C7      C8         1.400(4)                     .       .                   no
 C8      C9         1.395(3)                     .       .                   no
 C9      C10        1.372(4)                     .       .                   no
 C10     C11        1.380(4)                     .       .                   no
 C12     C13        1.527(4)                     .       .                   no
 C12     C26        1.525(4)                     .       .                   no
 C13     C14        1.514(3)                     .       .                   no
 C14     C15        1.410(3)                     .       .                   no
 C14     C19        1.384(3)                     .       .                   no
 C15     C16        1.404(4)                     .       .                   no
 C16     C17        1.386(4)                     .       .                   no
 C17     C18        1.385(4)                     .       .                   no
 C18     C19        1.384(4)                     .       .                   no
 C20     C21        1.400(4)                     .       .                   no
 C20     C25        1.392(4)                     .       .                   no
 C21     C22        1.394(4)                     .       .                   no
 C22     C23        1.368(5)                     .       .                   no
 C23     C24        1.386(4)                     .       .                   no
 C24     C25        1.391(4)                     .       .                   no
 C26     C27        1.384(4)                     .       .                   no
 C26     C31        1.397(3)                     .       .                   no
 C27     C28        1.386(4)                     .       .                   no
 C28     C29        1.374(4)                     .       .                   no
 C29     C30        1.373(4)                     .       .                   no
 C30     C31        1.375(4)                     .       .                   no
 C32     C33        1.403(4)                     .       .                   no
 C32     C39        1.523(4)                     .       .                   no
 C33     C34        1.521(5)                     .       .                   no
 C34     C35        1.521(5)                     .       .                   no
 C35     C36        1.515(5)                     .       .                   no
 C36     C37        1.366(4)                     .       .                   no
 C37     C38        1.498(4)                     .       .                   no
 C38     C39        1.525(5)                     .       .                   no
 C4      H41          0.9996                     .       .                   no
 C5      H51          0.9901                     .       .                   no
 C5      H52          0.9902                     .       .                   no
 C8      H81          0.9505                     .       .                   no
 C9      H91          0.9504                     .       .                   no
 C10     H101         0.9505                     .       .                   no
 C11     H111         0.9497                     .       .                   no
 C12     H121         0.9996                     .       .                   no
 C13     H131         0.9900                     .       .                   no
 C13     H132         0.9900                     .       .                   no
 C16     H161         0.9494                     .       .                   no
 C17     H171         0.9501                     .       .                   no
 C18     H181         0.9499                     .       .                   no
 C19     H191         0.9493                     .       .                   no
 C21     H211         0.9504                     .       .                   no
 C22     H221         0.9500                     .       .                   no
 C23     H231         0.9501                     .       .                   no
 C24     H241         0.9498                     .       .                   no
 C25     H251         0.9505                     .       .                   no
 C27     H271         0.9502                     .       .                   no
 C28     H281         0.9500                     .       .                   no
 C29     H291         0.9507                     .       .                   no
 C30     H301         0.9507                     .       .                   no
 C31     H311         0.9497                     .       .                   no
 C32     H321         0.9501                     .       .                   no
 C33     H331         0.9502                     .       .                   no
 C34     H341         0.9898                     .       .                   no
 C34     H342         0.9897                     .       .                   no
 C35     H351         0.9906                     .       .                   no
 C35     H352         0.9901                     .       .                   no
 C36     H361         0.9501                     .       .                   no
 C37     H371         0.9501                     .       .                   no
 C38     H381         0.9897                     .       .                   no
 C38     H382         0.9910                     .       .                   no
 C39     H391         0.9905                     .       .                   no
 C39     H392         0.9910                     .       .                   no
 
loop_
_geom_angle_atom_site_label_1
_geom_angle_atom_site_label_2
_geom_angle_atom_site_label_3
_geom_angle
_geom_angle_site_symmetry_1
_geom_angle_site_symmetry_2
_geom_angle_site_symmetry_3
_geom_angle_publ_flag
 Cl      Rh      C1         89.57(8)             .       .       .           yes
 Cl      Rh      C32       166.71(8)             .       .       .           yes
 Cl      Rh      C33       154.54(8)             .       .       .           yes
 Cl      Rh      C36        91.99(9)             .       .       .           yes
 Cl      Rh      C37        91.95(7)             .       .       .           yes
 C1      Rh      C32       92.05(10)             .       .       .           yes
 C1      Rh      C33       90.17(11)             .       .       .           yes
 C1      Rh      C36      164.05(10)             .       .       .           yes
 C1      Rh      C37       160.03(9)             .       .       .           yes
 C32     Rh      C33       38.69(11)             .       .       .           yes
 C32     Rh      C36       90.08(11)             .       .       .           yes
 C32     Rh      C37       82.10(10)             .       .       .           yes
 C33     Rh      C36       81.65(12)             .       .       .           yes
 C33     Rh      C37       96.85(11)             .       .       .           yes
 C36     Rh      C37       35.77(10)             .       .       .           yes
 C1      N1      C2       112.59(18)             .       .       .           yes
 C1      N1      C4       123.95(18)             .       .       .           yes
 C2      N1      C4       123.29(18)             .       .       .           yes
 C1      N2      C3       112.23(17)             .       .       .           yes
 C1      N2      C12      125.90(18)             .       .       .           yes
 C3      N2      C12      120.16(18)             .       .       .           yes
 Rh      C1      N1       126.15(16)             .       .       .           yes
 Rh      C1      N2       130.29(16)             .       .       .           yes
 N1      C1      N2       103.55(18)             .       .       .           yes
 N1      C2      C3       105.77(18)             .       .       .           yes
 N1      C2      C7         117.5(2)             .       .       .           yes
 C3      C2      C7         136.8(2)             .       .       .           no
 N2      C3      C2       105.81(19)             .       .       .           yes
 N2      C3      C15      117.86(18)             .       .       .           yes
 C2      C3      C15        136.3(2)             .       .       .           no
 N1      C4      C5         106.2(2)             .       .       .           yes
 N1      C4      C20        112.2(2)             .       .       .           yes
 C5      C4      C20      115.60(19)             .       .       .           no
 C4      C5      C6         111.0(2)             .       .       .           no
 C5      C6      C7         119.1(2)             .       .       .           no
 C5      C6      C11        121.6(2)             .       .       .           no
 C7      C6      C11        119.3(2)             .       .       .           no
 C2      C7      C6         116.7(2)             .       .       .           no
 C2      C7      C8         123.2(2)             .       .       .           no
 C6      C7      C8         120.0(2)             .       .       .           no
 C7      C8      C9         118.9(2)             .       .       .           no
 C8      C9      C10        121.1(3)             .       .       .           no
 C9      C10     C11        120.2(2)             .       .       .           no
 C6      C11     C10        120.4(2)             .       .       .           no
 N2      C12     C13      105.87(18)             .       .       .           yes
 N2      C12     C26      109.82(19)             .       .       .           yes
 C13     C12     C26        114.7(2)             .       .       .           no
 C12     C13     C14        110.1(2)             .       .       .           no
 C13     C14     C15        118.7(2)             .       .       .           no
 C13     C14     C19        121.8(2)             .       .       .           no
 C15     C14     C19        119.5(2)             .       .       .           no
 C3      C15     C14        118.4(2)             .       .       .           no
 C3      C15     C16        122.8(2)             .       .       .           no
 C14     C15     C16        118.8(2)             .       .       .           no
 C15     C16     C17        120.5(2)             .       .       .           no
 C16     C17     C18        119.9(3)             .       .       .           no
 C17     C18     C19        120.1(2)             .       .       .           no
 C14     C19     C18        121.0(2)             .       .       .           no
 C4      C20     C21        117.9(2)             .       .       .           no
 C4      C20     C25        124.3(2)             .       .       .           no
 C21     C20     C25        117.8(2)             .       .       .           no
 C20     C21     C22        121.3(2)             .       .       .           no
 C21     C22     C23        119.8(3)             .       .       .           no
 C22     C23     C24        120.1(3)             .       .       .           no
 C23     C24     C25        120.3(3)             .       .       .           no
 C20     C25     C24        120.7(3)             .       .       .           no
 C12     C26     C27        121.1(2)             .       .       .           no
 C12     C26     C31        121.2(2)             .       .       .           no
 C27     C26     C31        117.6(2)             .       .       .           no
 C26     C27     C28        121.1(3)             .       .       .           no
 C27     C28     C29        120.5(3)             .       .       .           no
 C28     C29     C30        119.1(3)             .       .       .           no
 C29     C30     C31        120.9(3)             .       .       .           no
 C26     C31     C30        120.9(2)             .       .       .           no
 Rh      C32     C33       70.29(16)             .       .       .           yes
 Rh      C32     C39        112.7(2)             .       .       .           yes
 C33     C32     C39        123.4(3)             .       .       .           no
 Rh      C33     C32       71.01(15)             .       .       .           yes
 Rh      C33     C34        110.7(2)             .       .       .           yes
 C32     C33     C34        125.7(3)             .       .       .           no
 C33     C34     C35        114.0(3)             .       .       .           no
 C34     C35     C36        113.7(3)             .       .       .           no
 Rh      C36     C35      110.41(19)             .       .       .           yes
 Rh      C36     C37       71.31(15)             .       .       .           yes
 C35     C36     C37        123.6(3)             .       .       .           no
 Rh      C37     C36       72.92(16)             .       .       .           yes
 Rh      C37     C38      106.73(17)             .       .       .           yes
 C36     C37     C38        127.2(3)             .       .       .           no
 C37     C38     C39        114.4(2)             .       .       .           no
 C32     C39     C38        113.3(3)             .       .       .           no
 N1      C4      H41          107.45             .       .       .           no
 C5      C4      H41          107.53             .       .       .           no
 C20     C4      H41          107.50             .       .       .           no
 C4      C5      H51          109.42             .       .       .           no
 C4      C5      H52          109.44             .       .       .           no
 C6      C5      H51          109.51             .       .       .           no
 C6      C5      H52          109.43             .       .       .           no
 H51     C5      H52          108.01             .       .       .           no
 C7      C8      H81          120.55             .       .       .           no
 C9      C8      H81          120.54             .       .       .           no
 C8      C9      H91          119.41             .       .       .           no
 C10     C9      H91          119.51             .       .       .           no
 C9      C10     H101         119.85             .       .       .           no
 C11     C10     H101         119.94             .       .       .           no
 C6      C11     H111         119.86             .       .       .           no
 C10     C11     H111         119.78             .       .       .           no
 N2      C12     H121         108.72             .       .       .           no
 C13     C12     H121         108.76             .       .       .           no
 C26     C12     H121         108.81             .       .       .           no
 C12     C13     H131         109.64             .       .       .           no
 C12     C13     H132         109.64             .       .       .           no
 C14     C13     H131         109.65             .       .       .           no
 C14     C13     H132         109.67             .       .       .           no
 H131    C13     H132         108.10             .       .       .           no
 C15     C16     H161         119.69             .       .       .           no
 C17     C16     H161         119.77             .       .       .           no
 C16     C17     H171         120.07             .       .       .           no
 C18     C17     H171         120.06             .       .       .           no
 C17     C18     H181         119.93             .       .       .           no
 C19     C18     H181         119.98             .       .       .           no
 C14     C19     H191         119.51             .       .       .           no
 C18     C19     H191         119.54             .       .       .           no
 C20     C21     H211         119.36             .       .       .           no
 C22     C21     H211         119.32             .       .       .           no
 C21     C22     H221         120.08             .       .       .           no
 C23     C22     H221         120.13             .       .       .           no
 C22     C23     H231         119.99             .       .       .           no
 C24     C23     H231         119.91             .       .       .           no
 C23     C24     H241         119.79             .       .       .           no
 C25     C24     H241         119.89             .       .       .           no
 C20     C25     H251         119.69             .       .       .           no
 C24     C25     H251         119.63             .       .       .           no
 C26     C27     H271         119.44             .       .       .           no
 C28     C27     H271         119.49             .       .       .           no
 C27     C28     H281         119.77             .       .       .           no
 C29     C28     H281         119.73             .       .       .           no
 C28     C29     H291         120.54             .       .       .           no
 C30     C29     H291         120.41             .       .       .           no
 C29     C30     H301         119.56             .       .       .           no
 C31     C30     H301         119.53             .       .       .           no
 C26     C31     H311         119.52             .       .       .           no
 C30     C31     H311         119.59             .       .       .           no
 Rh      C32     H321          87.06             .       .       .           no
 C33     C32     H321         118.28             .       .       .           no
 C39     C32     H321         118.33             .       .       .           no
 Rh      C33     H331          88.21             .       .       .           no
 C32     C33     H331         117.19             .       .       .           no
 C34     C33     H331         117.13             .       .       .           no
 C33     C34     H341         108.78             .       .       .           no
 C33     C34     H342         108.79             .       .       .           no
 C35     C34     H341         108.72             .       .       .           no
 C35     C34     H342         108.70             .       .       .           no
 H341    C34     H342         107.67             .       .       .           no
 C34     C35     H351         108.80             .       .       .           no
 C34     C35     H352         108.84             .       .       .           no
 C36     C35     H351         108.82             .       .       .           no
 C36     C35     H352         108.83             .       .       .           no
 H351    C35     H352         107.65             .       .       .           no
 Rh      C36     H361          88.32             .       .       .           no
 C35     C36     H361         118.15             .       .       .           no
 C37     C36     H361         118.27             .       .       .           no
 Rh      C37     H371          90.42             .       .       .           no
 C36     C37     H371         116.44             .       .       .           no
 C38     C37     H371         116.39             .       .       .           no
 C37     C38     H381         108.65             .       .       .           no
 C37     C38     H382         108.71             .       .       .           no
 C39     C38     H381         108.65             .       .       .           no
 C39     C38     H382         108.61             .       .       .           no
 H381    C38     H382         107.62             .       .       .           no
 C32     C39     H391         108.99             .       .       .           no
 C32     C39     H392         108.93             .       .       .           no
 C38     C39     H391         108.93             .       .       .           no
 C38     C39     H392         108.86             .       .       .           no
 H391    C39     H392         107.73             .       .       .           no

# End of Crystallographic Information File
